# Supplementary material for: Are cardiovascular health measures heritable across three generations of families in Soweto, South Africa? A cross-sectional analysis using the random family method
Source: PubMed Central journal article supplement (PMC9511591; doi:10.1136/bmjopen-2021-059910), 2022-09-23

Supplementary figure 1 showing the relationships between the heritability parameters for LVMI (adjusted for body surface areas) and carotid IMT (cIMT).

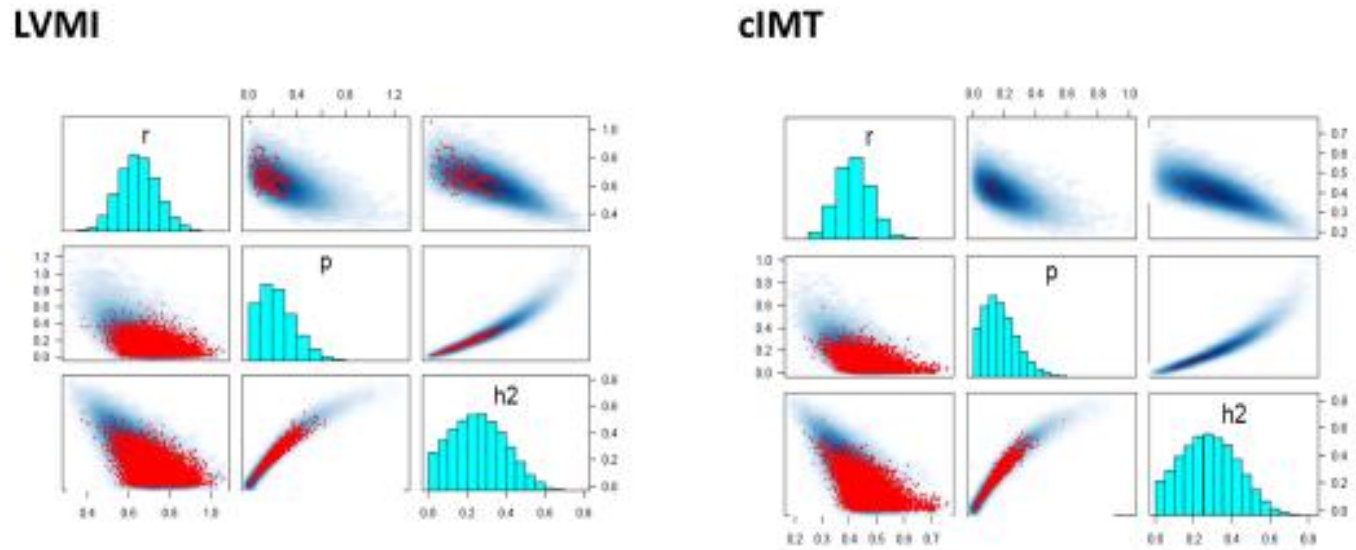

Supplement: bmjopen-2021-059910supp002.pdf [file bmjopen-2021-059910supp002.pdf]
